# Supplementary material for: Carbon nanotubes induced fibrogenesis on nanostructured substrates
Source: Royal Society of Chemistry journal article supplement (doi:10.1039/c6en00402d), 2017-01-01
Supplement: c6en00402d1.pdf [file c6en00402d1.pdf]

## Carbon Nanotubes Induced Fibrogenesis on Nanostructured Substrates

Kai Wang<sup>a</sup>, Xiaoqing He<sup>b</sup>, Will Linthicum<sup>c</sup>, Ryan Mezan<sup>a</sup>, Liying Wang<sup>d</sup>, Yon Rojasakul<sup>b</sup>, Qi Wen<sup>c,e</sup>, Yong Yang<sup>a\*</sup>

- Department of Chemical and Biomedical Engineering, West Virginia University, Morgantown, West Virginia, USA, 26506.
- Department of Basic Pharmaceutical Sciences, West Virginia University, Morgantown, West Virginia, USA, 26506.
- Department of Biomedical Engineering, Worcester Polytechnic Institute, Worcester, Massachusetts, USA, 01609.
- Allergy and Clinical Immunology Branch, National Institute for Occupational Safety and Health, Morgantown, West Virginia, USA, 26505
- Department of Physics, Worcester Polytechnic Institute, Worcester, Massachusetts, USA, 01609.

\* Corresponding author: [yong.yang@mail.wvu.edu](mailto:yong.yang@mail.wvu.edu)

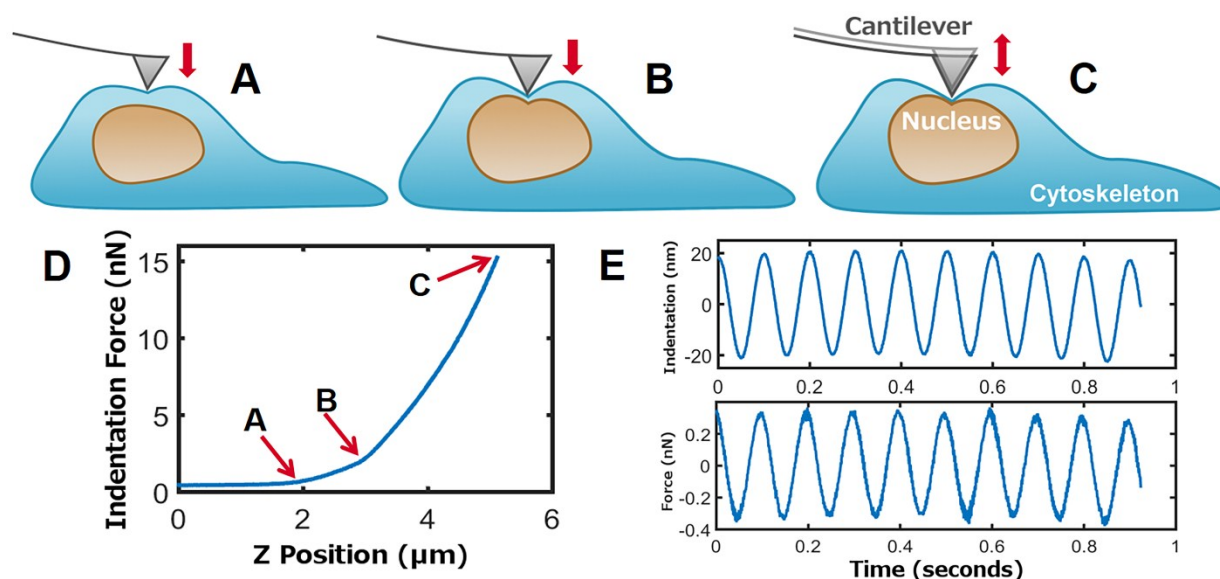

**Fig. S1 Force curve acquisition.** (A) The cantilever of the AFM first makes contact with the cytoskeleton positioned over the nucleus. (B) The cantilever begins to indent into the nucleus, causing an increase in the second derivative of the force curve. (C) The cantilever is programmed to oscillate at the lowest position of the indentation. (D) Depiction of where events (A), (B), and (C) occur on a force – indentation curve. (E) A graphical depiction of the indentation and force oscillation at position (C).

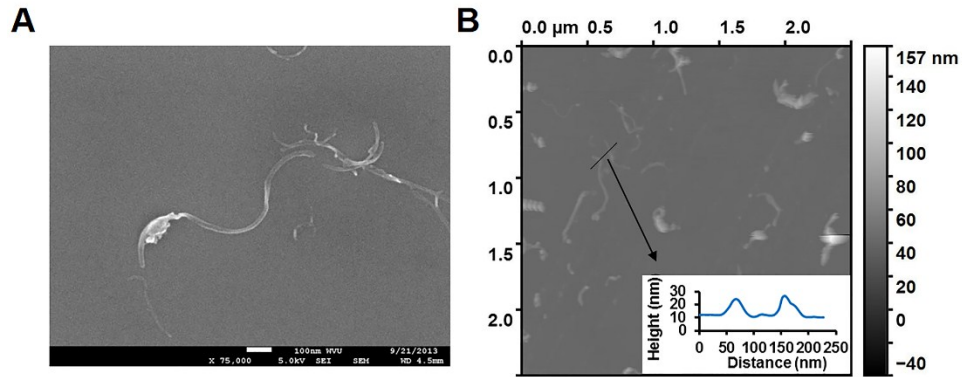

**Fig. S2 Characterization of MWCNTs.** (A) SEM micrographs of MWCNTs. Scale bar is 100 nm. (B) AFM topography of MWCNTs. The inset shows the height of MWCNTs as marked with black line in (B).

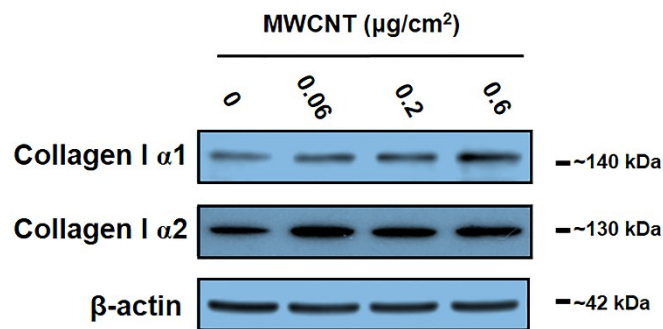

**Fig. S3 Expression of collagen I  $\alpha 1$  and  $\alpha 2$  in fibroblasts treated with MWCNTs at various doses.**  $\beta$ -actin was used as the loading control.

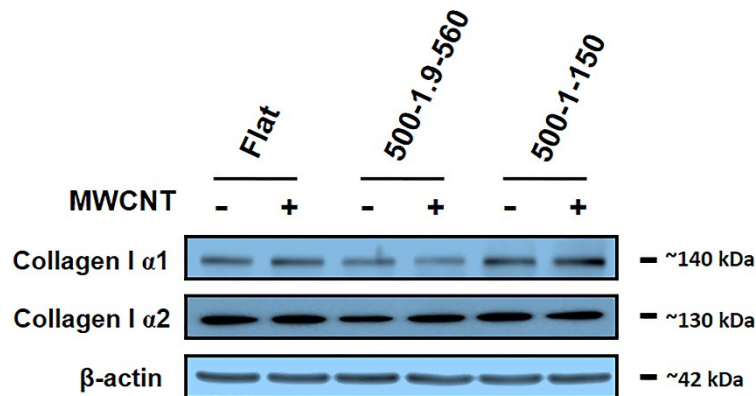

**Fig. S4 Expression of collagen I  $\alpha 1$  and  $\alpha 2$  in fibroblasts grown on various substrates in response to MWCNTs at  $0.2 \mu\text{g}/\text{cm}^2$ .**  $\beta$ -actin was used as the loading control.

**Table 1. A list of antibodies used for western blotting analysis**

| <b>Primary Antibody</b> | <b>Origin/ Isotype</b> | <b>Supplier/ Cat#</b>                 | <b>Dilution</b> |
|-------------------------|------------------------|---------------------------------------|-----------------|
| Collagen 1              | Rabbit IgG1            | Fitzgerald/ 70R-CR007x                | 1:3000          |
| Collagen 1 $\alpha$ 1   | Rabbit IgG             | ThermoFisher scientific/<br>PA5-35380 | 1:1000          |
| Collagen 1 $\alpha$ 2   | Rabbit IgG             | Abcam/ ab208638                       | 1:500           |
| $\beta$ -actin          | Mouse IgG1             | Sigma/ A5441                          | 1:4000          |
